# Supplementary material
Source: PubMed Central journal article supplement (PMC2860387)
Supplement: NIHMS156333-supplement-Supp_Fig_3.pdf [file NIHMS156333-supplement-Supp_Fig_3.pdf]

(a)

PhEGS1 1 MAEKSKILIIIGGTGYIGKFVVEASAKAGHPTFVLVRES TVSDPAKGIKIVESFNNSGVITIL  
PpEGS1 1 MAEKSKILIIIGGTGYIGKFVVEASAKAGHPTFVLVREN TVSDPAKGIKIVESFNNSGVITIL

PhEGS1 61 YGDLYDHESLVKAIKQVDVVIS TVGQMQLADQTKIIAAIKEAGNIKRFFPSEFGMDVDKV  
PpEGS1 61 YGDLYDHESLVKAIKQVDVVIS TVGQMQLADQTKIIAAIKEAGNIKRFFPSEFGMDVDKV

PhEGS1 121 NAVEPAKSTFAIKVQIRRAIEAEGIPYTYVSSNCFAGYFLPTLVQPGAT PPRDKVIISG  
PpEGS1 121 NAVEPAKSTFAIKVQIRRAIEAEGIPYTYVSSNCFAGYFLPTLVQPGAT PPRDKVIISG

PhEGS1 181 DGNKAVFNEEHDIGTYTIKAVDDPRTLNTLYIKPPKNTLSFNELVAIWEKLIKGTLEK  
PpEGS1 181 DGNKAVFNEEHDIGTYTIKAVDDPRTLNTLYIKPPKNTLSFNELVAIWEKLIKGTLEK

PhEGS1 241 IYIPEEQILKDIATSPIPIINILAINHSTFVKGDQTNFVIEPSFGVEASELYPDVKYTTV  
PpEGS1 241 IYIPEEQILKDIATSPIPIINILAINHSTFVKGDQTNFVIEPSFGVEASELYPDVKYTTV

PhEGS1 301 EEYLSHFA  
PpEGS1 301 EEYLSHFA

(b)

PhCFAT 1 MGNTDFHVTVKKKEVVAAVLPMHHEHWL PMSNLDLLLPPLDFGVFFCYKRSNI DNDTKDD  
PpCFAT 1 MGNTDFHVTVKKKEVVAAVLPMHHEHWL PMSNLDLLLPPLDFGVFFCYKRSNI DNDTKDD

PhCFAT 61 DEITIKKALAE TLVSFYALAGEVVFNSLGEPELLCNRGVDFHAYADIELNLDLYHPDV  
PpCFAT 61 DEITIKKALAE TLVSFYALAGEVVFNSLGEPELLCNRGVDFHAYADIELNLDLYHPDV

PhCFAT 121 SVHEKLIPIKKGVL SVQVTGLKCGGIVVGC F DHRVADAYSANMFLVAAAIARKDNNI  
PpCFAT 121 SVHEKLIPIKKGVL SVQVTGLKCGGIVVGC F DHRVADAYSANMFLVAAAIARKDNNI

PhCFAT 181 NTVIPSFRRSLLNRRPPQFDDSE FIDSTYVFLSSPPKQPNVLT SRVYYINSQEINLLQS  
PpCFAT 181 NTVIPSFRRSLLNRRPPQFDDSE FIDSTYVFLSSPPKQPNVLT SRVYYINSQEINLLQS

PhCFAT 241 QATRNGSKRSKLECFSAFLWKTIAEGGIDDSKRCKLGI TVDGRQLRHDSSTTMKNYFGN  
PpCFAT 241 QATRNGSKRSKLECFSAFLWKTIAEGGIDDSKRCKLGI TVDGRQLRHDSSTTMKNYFGN

PhCFAT 301 VLSVPYTEASVGLKQTPLGKVADLVHTCLDNVANEHHEF SLIDWVELHRPQAIKVVYC  
PpCFAT 301 VLSVPYTEASVGLKQTPLGKVADLVHTCLDNVANEHHEF SLIDWVELHRPQAIKVVYC

PhCFAT 361 KDECNDEAAIVVSSGLRFPLSQVNFVGWCPDFGSYIFPWGGQTYVMPMPSPKNGDWIV  
PpCFAT 361 KDECNDEAAIVVSSGLRFPLSQVNFVGWCPDFGSYIFPWGGQTYVMPMPSPKNGDWIV

PhCFAT 421 YMHLQKKHLDLVETRAPHIFHPLTACYLDTATY  
PpCFAT 421 YMHLQKKHLDLVETRAPHIFHPLTACYLDTATY
